# Supplementary material for: Mesoporous and microporous carbons from one-pot hydrothermal products for supercapacitor electrodes: effects of porous structures and surface functionality
Source: Royal Society of Chemistry journal article supplement (doi:10.1039/d3nj04086k), 2023-01-01
Supplement: d3nj04086k1.pdf [file d3nj04086k1.pdf]

Supplementary materials

Mesoporous and microporous carbons from one-pot hydrothermal products for  
supercapacitor electrodes: effects of porous structures and surface functionality

*Siwen Wang<sup>a</sup>, Zhongxing Geng<sup>a\*</sup> and Wei Sun<sup>a\*</sup>*

<sup>a</sup>School of Petrochemical Engineering, Liaoning Petrochemical University

No.1 West Dandong Street, Fushun, Liaoning, 113001, China

[zjk27149@sohu.com](mailto:zjk27149@sohu.com)

[sunwei@lnpu.edu.cn](mailto:sunwei@lnpu.edu.cn)

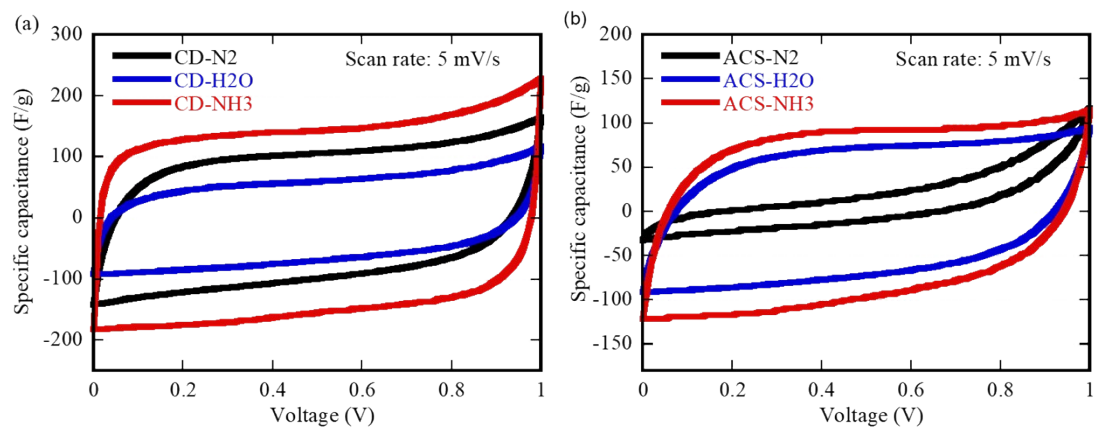

**Figure S1.** CV curves of the symmetric SCs for: CD-derived ACs and (b) ACSs at a scan rate of 5 mV/s. The electrolyte is 1 mol/L  $\text{Na}_2\text{SO}_4$ .

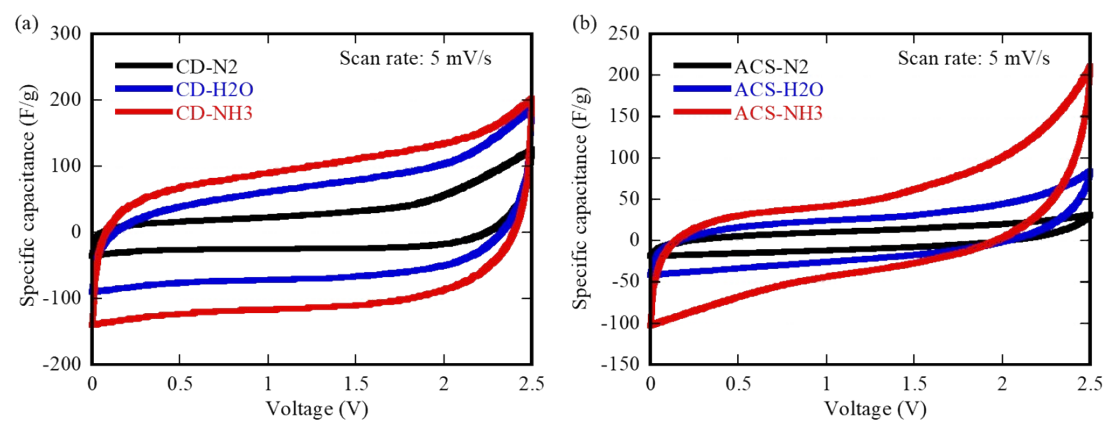

**Figure S2.** CV curves of the symmetric SCs for: CD-derived ACs and (b) ACSs at a scan rate of 5 mV/s. The electrolyte is 1 mol/L  $\text{Et}_4\text{NBF}_4$  in AN.

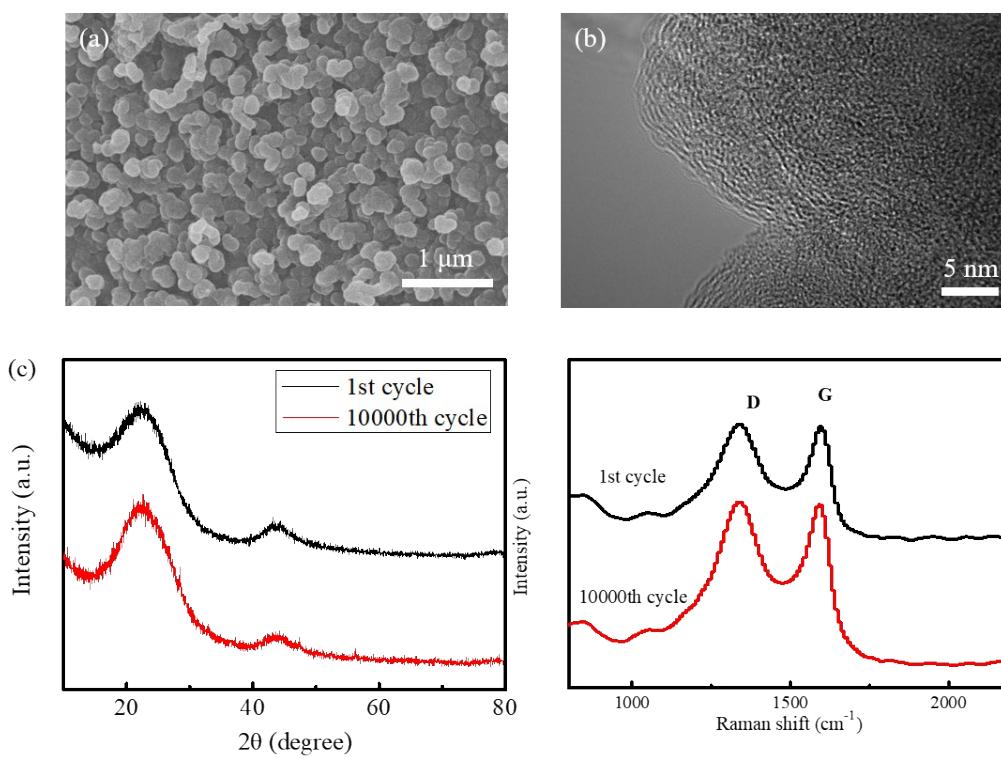

**Figure S3.** Characterization of microstructures of CD-NH<sub>3</sub> after 10000 GCD cycles at 10 A/g: (a) SEM images, (b) HRTEM image, (c) XRD patterns, and (d) Raman spectra.
